# Supplementary material
Source: publisher figshare collection journal article supplement (https://frontiersin.figshare.com/ndownloader/files/25468607)
Supplement: Supplementary file [file 25468607]

## Supplementary Material

| Page  | Table of Contents                                                                                                                                                                                                                 |
|-------|-----------------------------------------------------------------------------------------------------------------------------------------------------------------------------------------------------------------------------------|
| S2-S3 | Experimental detail for the synthesis of compound <b>2</b> .                                                                                                                                                                      |
| S4    | <b>Figures S1 and S2.</b> $^1\text{H}$ and DEPT spectra of ligand <b>3</b> in $\text{CDCl}_3$ .                                                                                                                                   |
| S5    | <b>Figures S3 and S4.</b> $^1\text{H}$ and $^{13}\text{C}$ NMR spectra of compound <b>5</b> in $\text{CDCl}_3$ .                                                                                                                  |
| S6    | <b>Figures S5 and S6.</b> $^1\text{H}$ and $^{13}\text{C}$ NMR spectra of ligand <b>8</b> in $\text{CDCl}_3$ .                                                                                                                    |
| S7    | <b>Figure S7</b> UV-Vis spectra of compound <b>3</b> with 10 equiv of various metal perchlorates and <b>Figure S8.</b> UV-vis and fluorescence titration studies of ligand                                                        |
| S8    | <b>Figure S9.</b> UV-vis and fluorescence titration studies of ligand <b>3</b> with $\text{Ag}^+$ .                                                                                                                               |
| S9    | <b>Figure S10.</b> $^1\text{H}$ NMR titration of <b>3</b> in $\text{CDCl}_3/\text{CD}_3\text{OH}$ (v/v, 3:1) in the presence of different equiv of $\text{AgClO}_4$ and <b>Figure S11.</b> H,H-COSY of <b>3</b> in the presence   |
| S10   | <b>Figure S12.</b> 2D NOESY of <b>3</b> in the presence of 2 equiv of $\text{Ag}^+$ and <b>Figure S13.</b> $^1\text{H}$ NMR titration of <b>3</b> in $\text{CDCl}_3/\text{CD}_3\text{OH}$ (v/v, 3:1) in the presence of different |
| S11   | <b>Figure S14.</b> UV-Vis spectra of ligand <b>8</b> with 10 equiv of various metal perchlorates.                                                                                                                                 |
| S12   | <b>Figures. S15.</b> UV-Vis, fluorescence spectra, Hill plot, and Job plot of ligand <b>8</b> with $\text{Ag}^+$ .                                                                                                                |
| S13   | <b>Figures. S16.</b> UV-Vis, fluorescence spectra, Hill plot, and Job plot of ligand <b>8</b> with $\text{Hg}^{2+}$ .                                                                                                             |
| S14   | <b>Figure S17.</b> Variable temperature $^1\text{H}$ NMR (-50 to 50 $^\circ\text{C}$ ) spectra of <b>8</b> with 1 equiv of $\text{AgClO}_4$ in $\text{CDCl}_3/\text{CD}_3\text{OH}$ (v/v, 3:1).                                   |
| S15   | <b>Figure S18.</b> The ESI-MS data of the complex <b>8</b> •( $\text{Ag}^+$ ) <sub>2</sub> .                                                                                                                                      |
| S16   | <b>Figure S19.</b> The $^1\text{H}$ NMR titration spectra of ligand <b>8</b> in the presence of different equiv of $\text{Hg}(\text{ClO}_4)_2$ in $\text{CDCl}_3/\text{CD}_3\text{OH}$ (v/v, 3:1).                                |

## Experimental detail for the synthesis of compound 2.

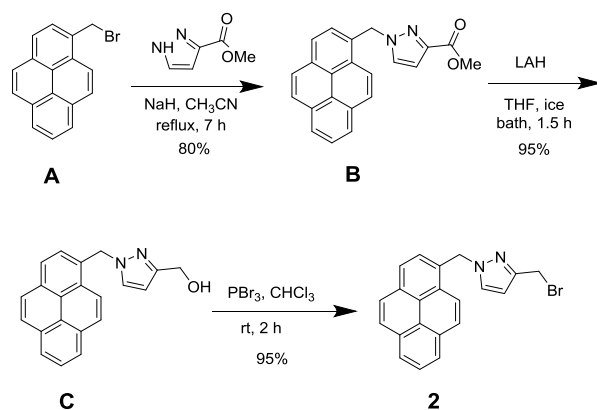

Scheme S1

**Synthesis of compound B.** Compound A<sup>[S1]</sup> was prepared according to literature procedures, which was then used for the synthesis of compound B. A mixture of methyl 1*H*-pyrazole-3-carboxylate 0.27 g (2.11 mmol) and sodium hydride 60% dispersion 105 mg (2.54 mmol) in 75 mL CH<sub>3</sub>CN was stirred vigorously at 0 °C for 15 min. The solution was added 1-(bromomethyl)pyrene A 0.50 g (1.69 mmol) and was heated to reflux for 7 h. The solvent was removed by reduced pressure. The solution was extracted with ethyl acetate/water (v/v, 1.5/1) and dried over anhydrous MgSO<sub>4</sub>. The residue was obtained after evaporation of the solvent and was subjected to a silica gel column chromatography (ethyl acetate/*n*-hexane = 1/3) to afford a white yellow solid (0.35 mg, 80 %); *R*<sub>f</sub> = 0.2 (ethyl acetate/*n*-hexane = 1/3), mp 112–114 °C. <sup>1</sup>H NMR (CDCl<sub>3</sub>, 400 MHz) δ<sub>H</sub> 8.24–8.01 (m, 8H), 7.83 (d, *J* = 7.8 Hz, 1H), 7.08 (d, *J* = 2.4 Hz, 1H), 6.75 (d, *J* = 2.4 Hz, 1H), 3.07 (m, 3H); <sup>13</sup>C NMR (CDCl<sub>3</sub>, 75.4 MHz) δ<sub>C</sub> 163.3 (Cq), 143.6 (Cq), 132.4 (Cq), 131.6 (Cq), 131.0 (CH), 130.9 (Cq), 129.8 (Cq), 129.3 (CH), 128.6 (CH), 128.1 (CH), 127.8 (Cq), 127.7 (CH), 126.7 (CH), 126.2 (CH), 126.1 (CH), 125.4 (Cq), 125.3 (CH), 124.9 (Cq), 122.5 (CH), 109.8 (CH), 55.6 (CH<sub>2</sub>), 52.5 (CH<sub>3</sub>). LREI-MS: *m/z* 215.1 [*M* - 125], 340.1 [*M*]<sup>+</sup>; HRMS: *m/z* calcd for C<sub>22</sub>H<sub>16</sub>N<sub>2</sub>O<sub>2</sub> 340.1212, found 340.1202.

**Synthesis of compound C from compound B.** A mixture of methyl 1-((pyren-3-yl)methyl)-1*H*-pyrazole-3-carboxylate (B) 1.00 g (2.94 mmol) and lithium aluminum hydride 0.13 mg (3.67 mmol) in 250 mL dried THF was stirred at 0 °C under nitrogen for 2 h. The reaction was ceased by adding 1 mL of 1N NaOH (aq) at 0 °C. The mixture was filtrated and extracted (150 mL × 3) in a mixture of ethyl acetate/water (1.5/1). The organic layer was rinsed with water thrice and dried over anhydrous MgSO<sub>4</sub>. The solvent of the organic layer was removed under reduced pressure to give a yellow solid (0.90 g, 97 %); *R*<sub>f</sub> = 0.08 (EtOAc/*n*-hexane = 1/3). Mp 128–130 °C. <sup>1</sup>H NMR (CDCl<sub>3</sub>, 400 MHz) δ<sub>H</sub> 8.26–7.97 (m, 8H), 7.83 (d, *J* = 7.8 Hz, 1H), 7.16 (d, *J* = 2.3 Hz, 1H), 6.21 (d, *J* = 2.3 Hz, 1H), 6.01 (s, 2H), 4.75 (d, *J* = 5.9 Hz, 2H). <sup>13</sup>C NMR (CDCl<sub>3</sub>, 100 MHz) δ<sub>C</sub> 152.2 (Cq), 131.6 (Cq), 131.2 (Cq), 130.6 (Cq), 130.3, (CH), 129.1 (Cq), 128.6 (Cq),

128.5 (CH), 127.8 (CH), 127.2 (CH), 127.2 (CH), 126.2 (CH), 125.6 (CH), 125.5 (CH), 124.9 (Cq), 124.8 (CH), 124.5 (Cq), 122.3 (CH), 104.4 (CH), 59.1 (CH<sub>2</sub>), 54.0 (CH<sub>2</sub>).

**Synthesis of compound 2 from compound C.** To a solution of compound **C** 1.00 g (3.20 mmol) in 60 mL of CHCl<sub>3</sub> was added dropwise 0.15 mL (1.12 mmol) of phosphorous tribromide and the resulting solution was refluxed for 2 h. The mixture was cooled and extracted thrice with CH<sub>2</sub>Cl<sub>2</sub>/water (1.5/1). The ether layer was dried over anhydrous MgSO<sub>4</sub> and the solvent was removed under reduced pressure to give a yellow solid (1.14 g. 95 %); *R*<sub>f</sub> = 0.45 (ethyl acetate/*n*-hexane = 1/3). <sup>1</sup>H NMR (CDCl<sub>3</sub>, 400 MHz) δ<sub>H</sub> 8.21–8.00 (m, 8H), 7.81 (d, *J* = 7.8 Hz, 1H), 7.11 (d, *J* = 2.1 Hz, 1H), 6.26 (d, *J* = 2.1 Hz, 1H), 5.98 (s, 2H), 4.57 (s, 1H). <sup>13</sup>C NMR (CDCl<sub>3</sub>, 100 MHz) δ<sub>C</sub> 148.8 (Cq), 131.7 (Cq), 131.1 (Cq), 130.6 (CH), 130.5 (Cq), 129.2 (Cq), 128.6 (CH), 128.3 (Cq), 127.9 (Cq), 127.3 (CH), 127.2 (CH), 126.2 (CH), 125.6 (CH), 125.5 (CH), 124.9 (Cq), 124.8 (CH), 124.5 (Cq), 122.2 (CH), 106.1 (CH), 54.3 (CH<sub>2</sub>), 25.4 (CH<sub>2</sub>). EI-MS: *m/z* 215 (M – 158)<sup>+</sup>, 373 (M)<sup>+</sup>, 375 (M + 2)<sup>+</sup>.

## Reference

S1. Soto, E., MacDonald, J. C., Cooper, C. G. F., and McGimpsey, W. G. (2003). *J. Am. Chem. Soc.* 125, 2838.

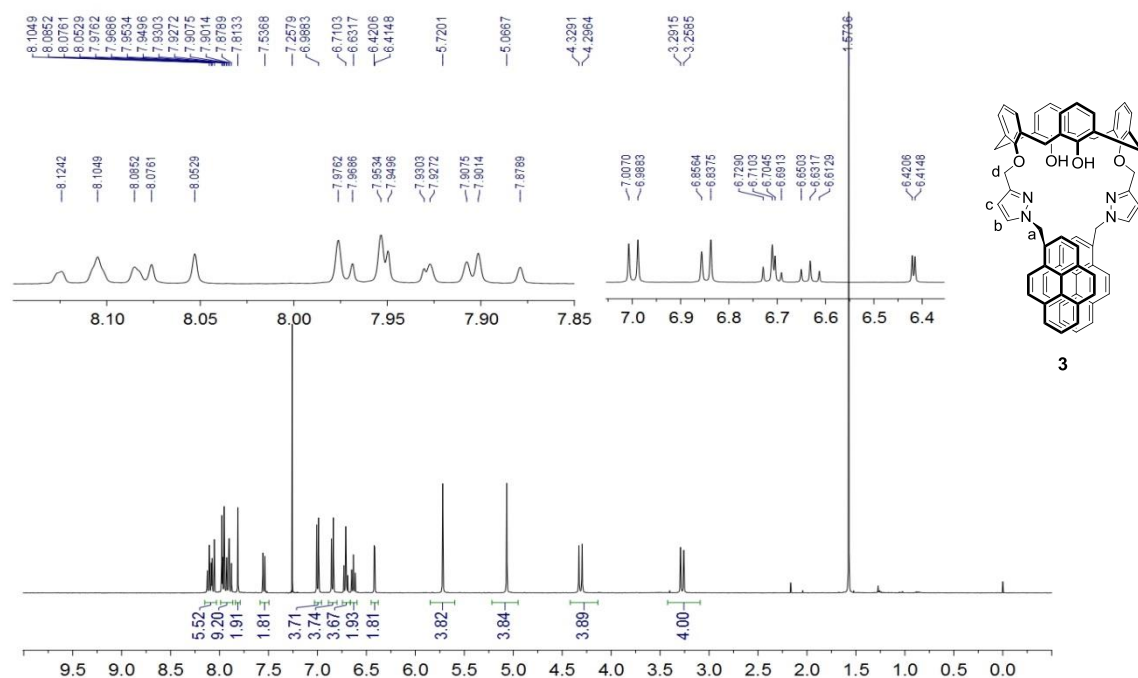

**Figure S1.**  $^1\text{H}$  NMR (400 MHz,  $\text{CDCl}_3$ ) spectra of 25,27-Bisoxo-(3-methyl-1-pyren-1-ylmethyl-1*H*-pyrazole)-26,28-dihydroxycalix[4]arene **3**.

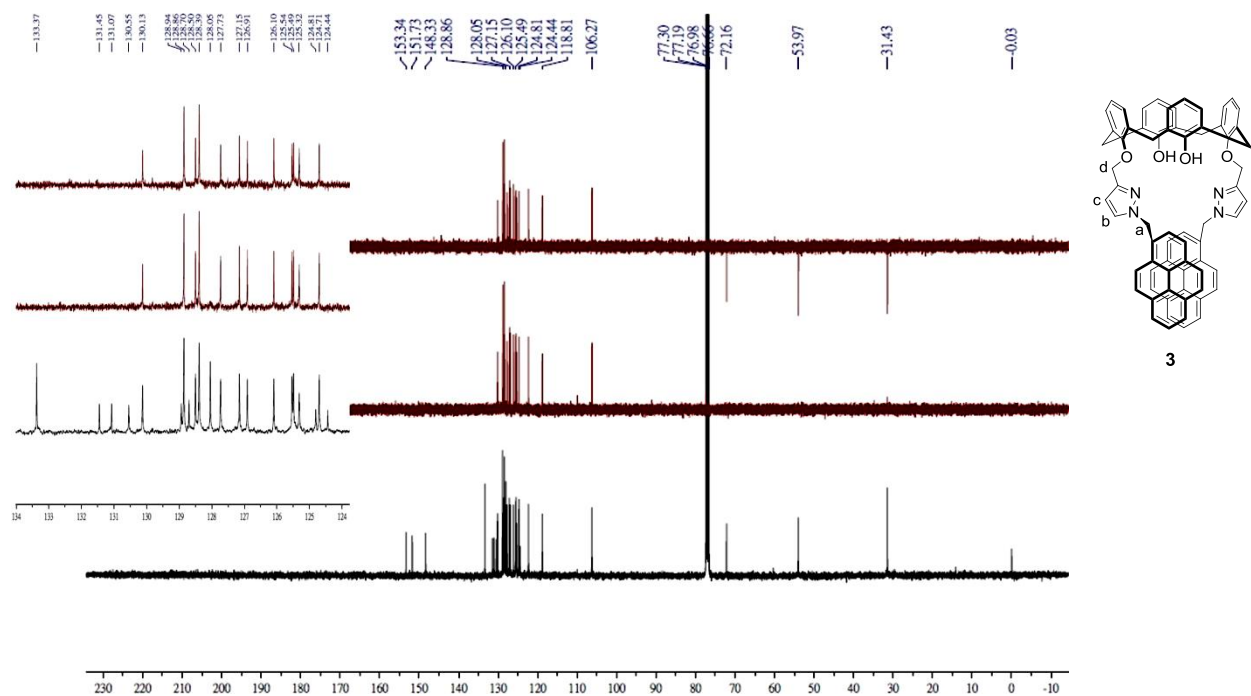

**Figure S2.**  $^{13}\text{C}$ - and DEPT NMR (100 MHz,  $\text{CDCl}_3$ ) spectra of 25,27-Bisoxo-(3-methyl-1-pyren-1-ylmethyl-1*H*-pyrazole)-26,28-dihydroxycalix[4]arene **3**.

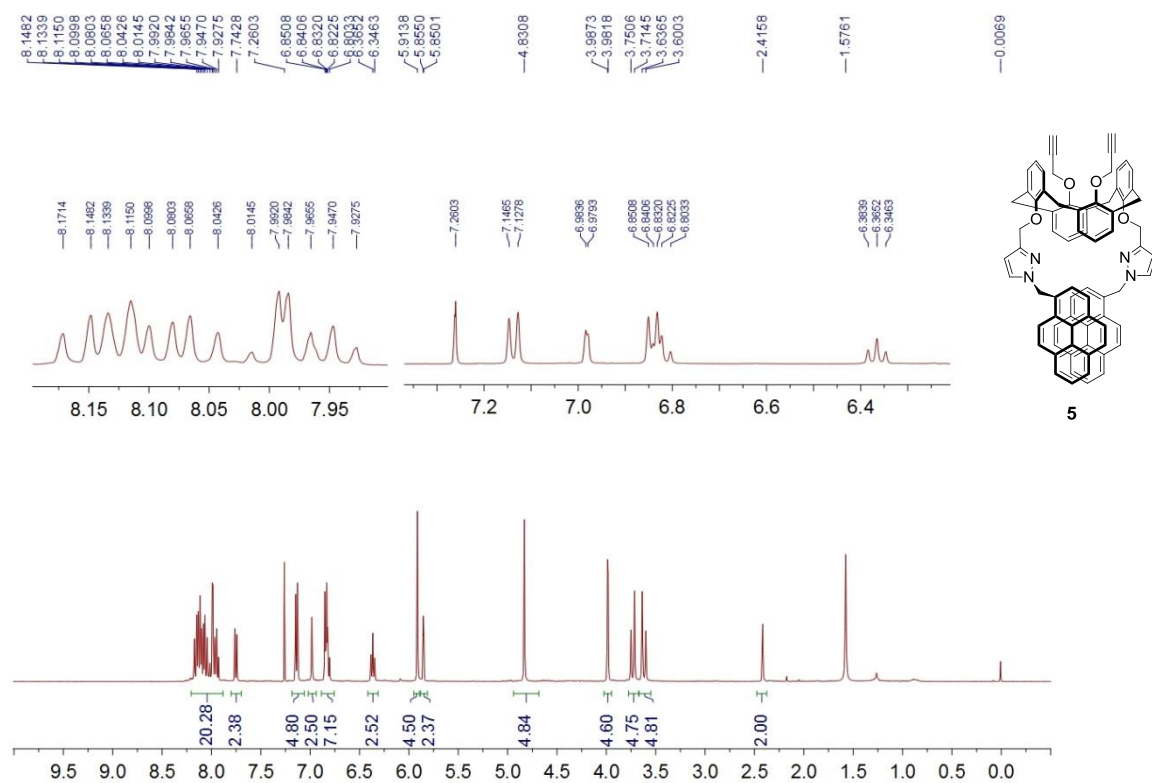

**Figure S3.** <sup>1</sup>H NMR (400 MHz, CDCl<sub>3</sub>) spectra of 1,3-alternate calix[4]arene **5**.

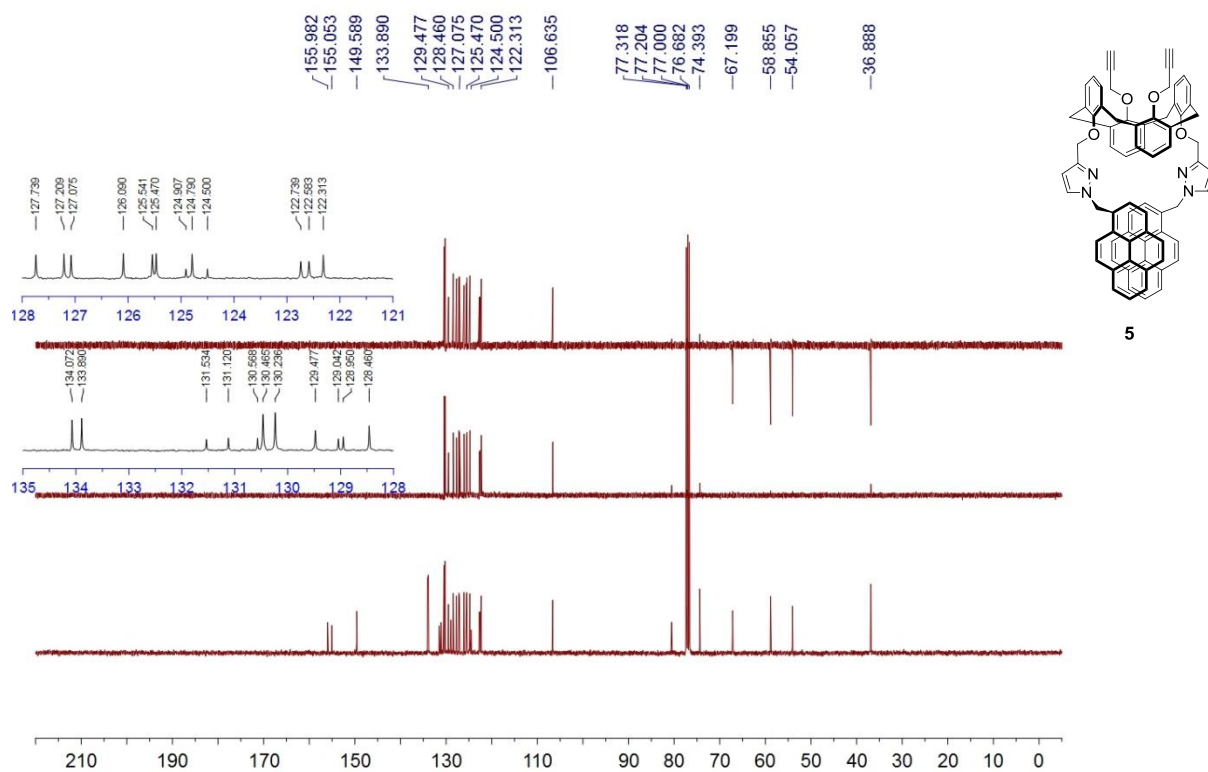

**Figure S4.** <sup>13</sup>C- and DEPT NMR (100 MHz, CDCl<sub>3</sub>) spectra of 1,3-alternate calix[4]arene **5**.

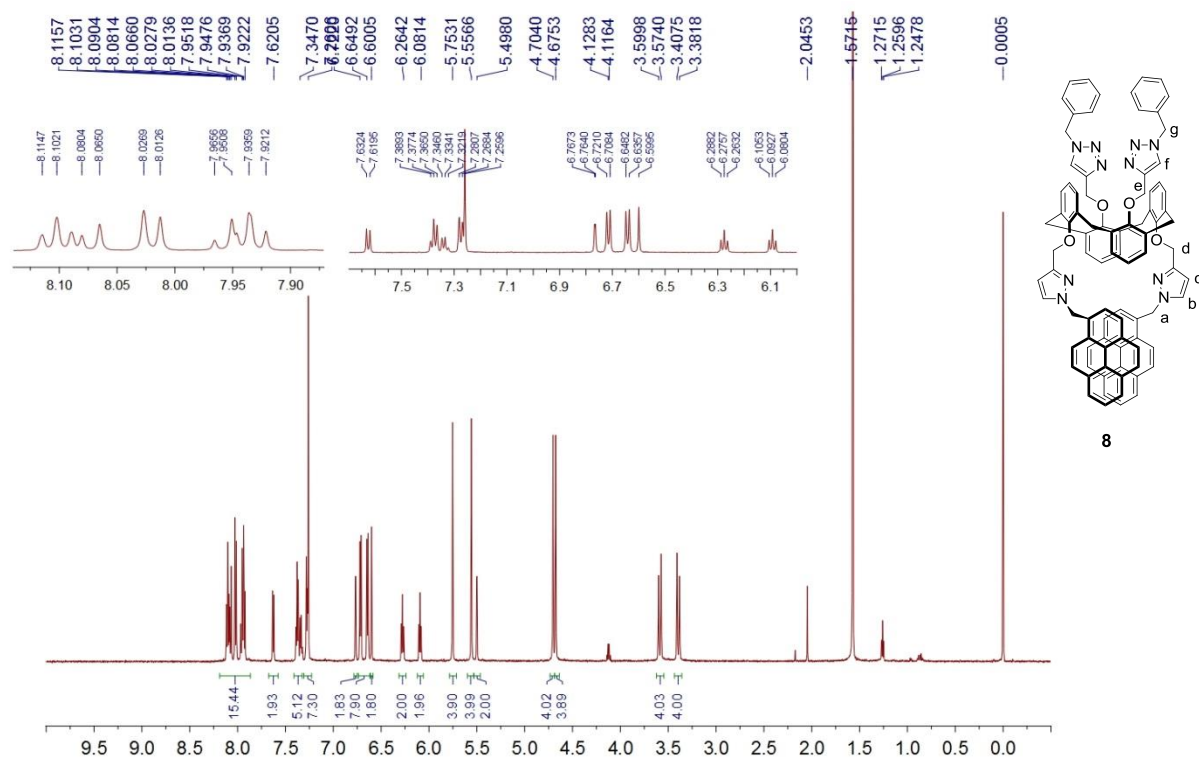

**Figure S5.**  $^1\text{H}$  NMR (600 MHz,  $\text{CDCl}_3$ ) spectra of 1,3-alternate calix[4]arene **8**.

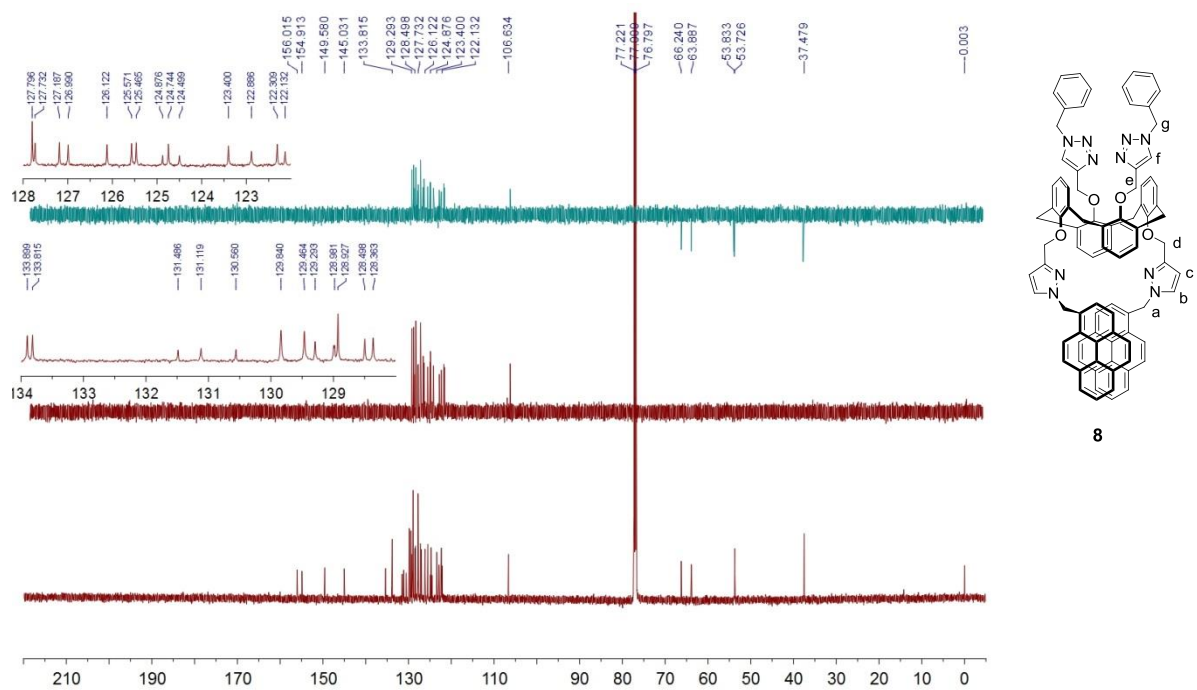

**Figure S6.**  $^{13}\text{C}$ - and DEPT NMR (150 MHz,  $\text{CDCl}_3$ ) spectra of 1,3-alternate calix[4]arene **8**.

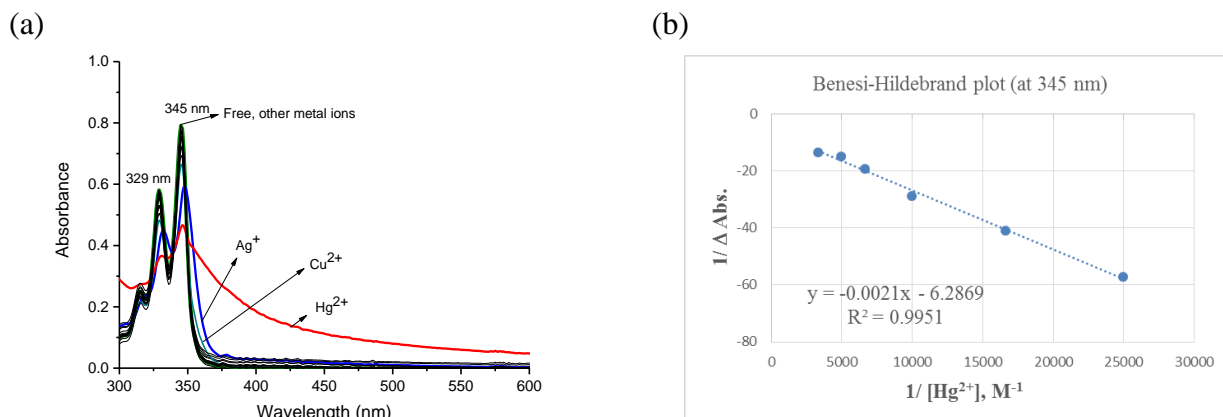

**Figure S7.** (a) UV-Vis spectra of ligand **3** (10  $\mu\text{M}$ ) by the addition of 10 equiv of various metal perchlorates ( $\text{Ag}^+$ ,  $\text{Ba}^{2+}$ ,  $\text{Ca}^{2+}$ ,  $\text{Cd}^{2+}$ ,  $\text{Co}^{2+}$ ,  $\text{Cr}^{3+}$ ,  $\text{Cu}^{2+}$ ,  $\text{Hg}^{2+}$ ,  $\text{Li}^+$ ,  $\text{Na}^+$ ,  $\text{K}^+$ ,  $\text{Mg}^{2+}$ ,  $\text{Ni}^{2+}$ ,  $\text{Pb}^{2+}$ , and  $\text{Zn}^{2+}$ ) in co-solvent  $\text{CHCl}_3/\text{MeOH}$  (v/v, 3:1) and (b) Corresponding Benesi-Hildebrand plot of the UV-vis absorption of ligand **3** (10  $\mu\text{M}$ ) at 345 nm with various equiv. of  $\text{Hg}(\text{ClO}_4)_2$  at 298K.

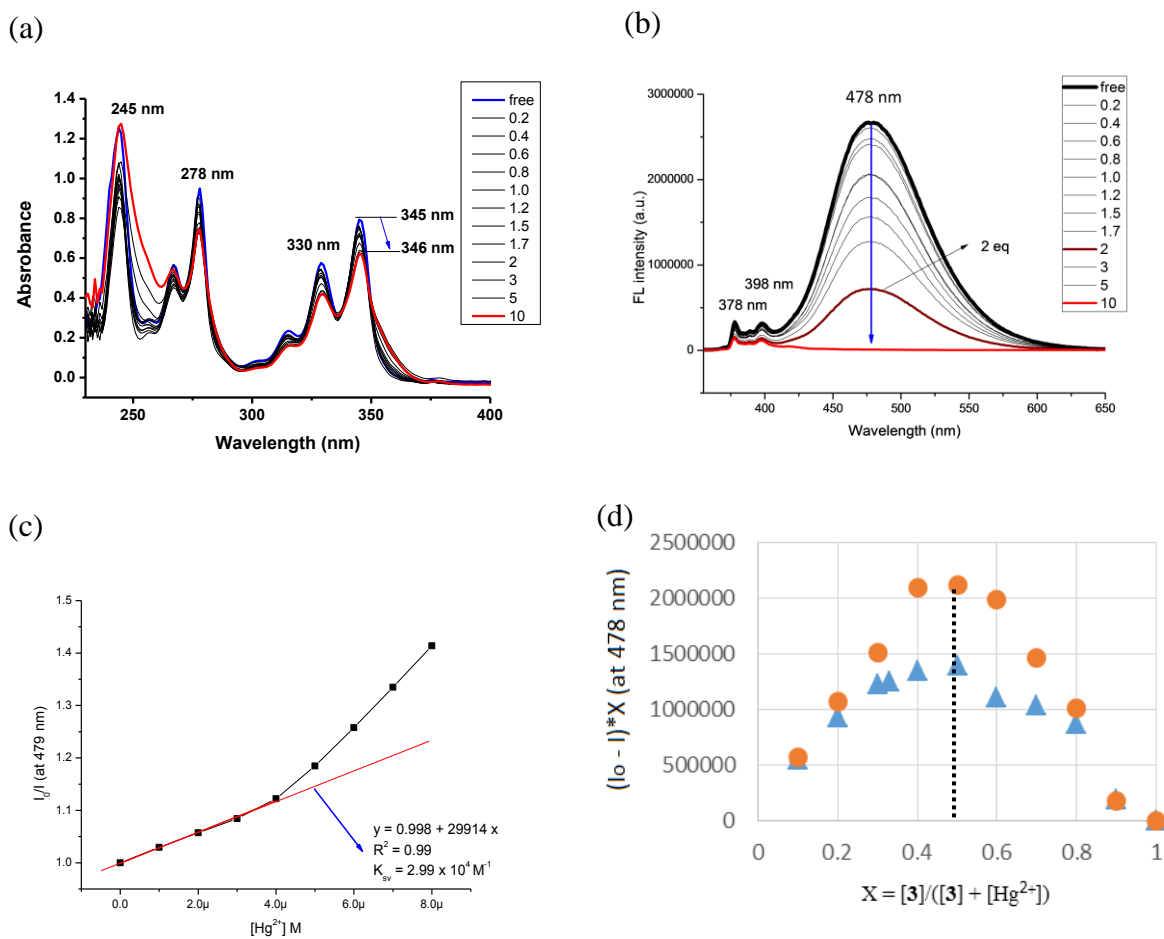

**Figure S8.** (a) The UV-Vis spectra, (b) the fluorescence emission spectra, (c) the Stern-Volmer plot fitting, and (d) the Job plot of ligand **3** (10  $\mu\text{M}$ ) with various equiv. of  $\text{Hg}(\text{ClO}_4)_2$  in co-solvent  $\text{CHCl}_3/\text{MeOH}$  (v/v, 3:1), two sets of experimental data are overlaid.

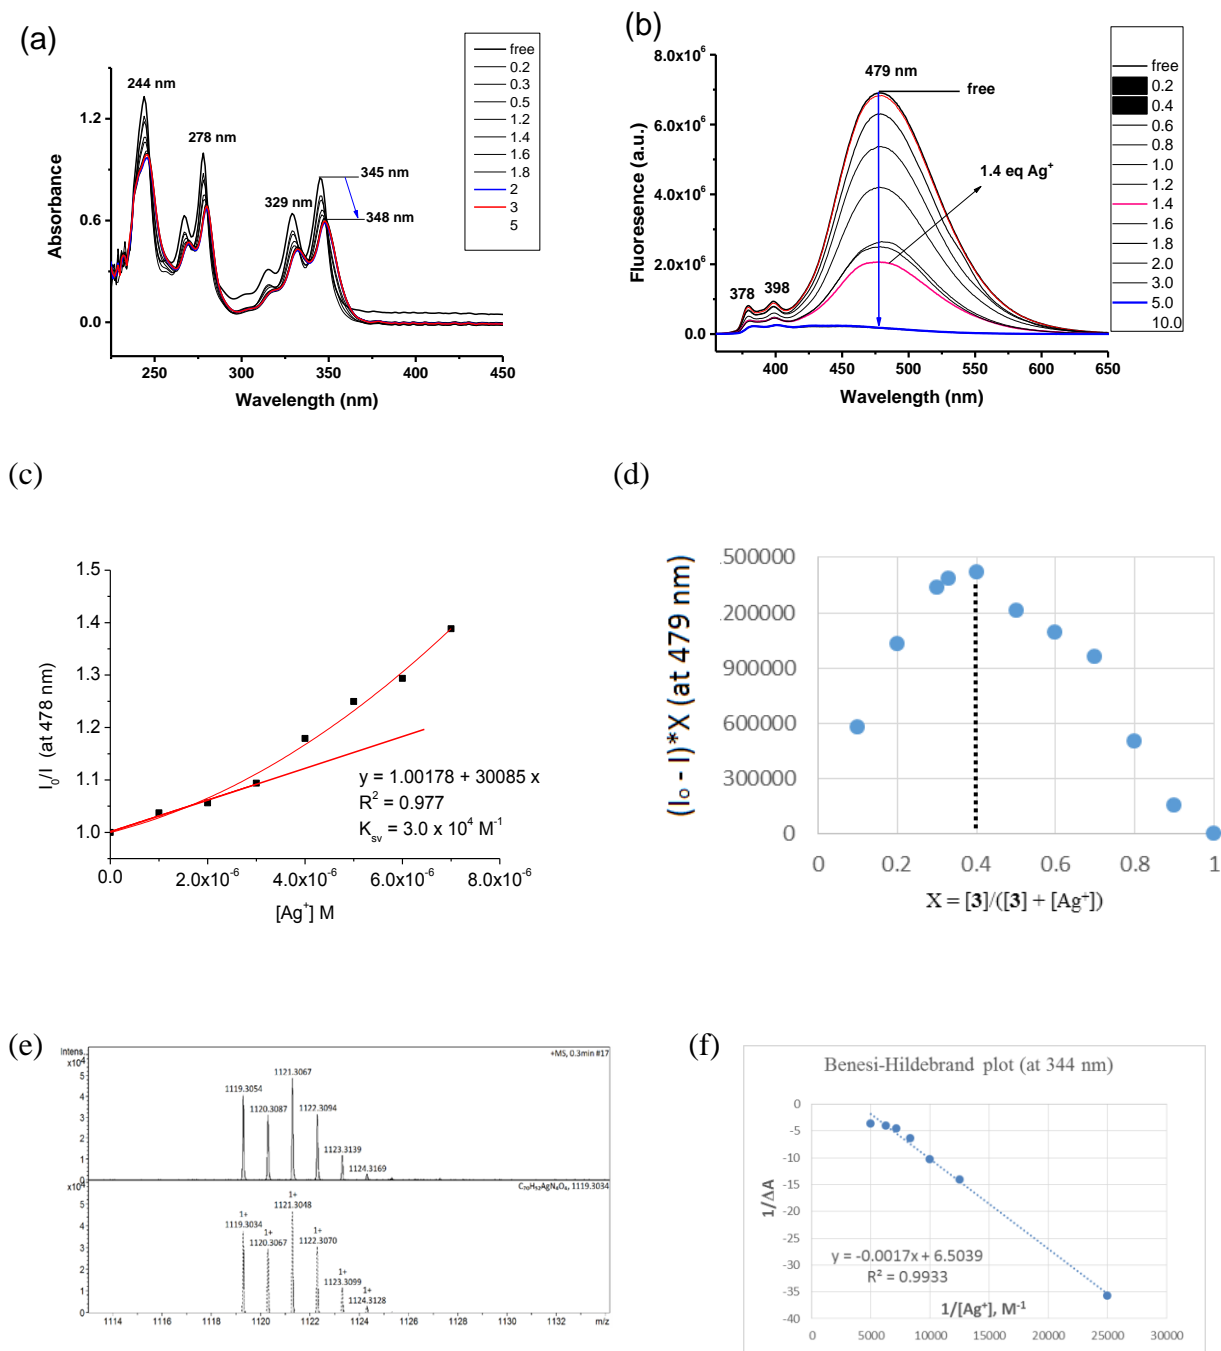

**Figure S9.** (a) The UV-Vis spectra, (b) the fluorescence emission spectra, (c) the Stern-Volmer plot fitting, (d) the Job plot of ligand **3** (10  $\mu\text{M}$ ) with various equiv. of  $\text{AgClO}_4$  in co-solvent  $\text{CHCl}_3/\text{MeOH}$  (v/v, 3:1), (e) HRMS of a 1:1 complex of  $\mathbf{3} \cdot \text{Ag}^+$  and (f) Benesi-Hildebrand plot of the UV-vis absorption of ligand **3** (10  $\mu\text{M}$ ) at 344 nm with various equiv. of  $\text{AgClO}_4$  in co-solvent  $\text{CHCl}_3/\text{MeOH}$  (v/v, 3:1) at 298K.



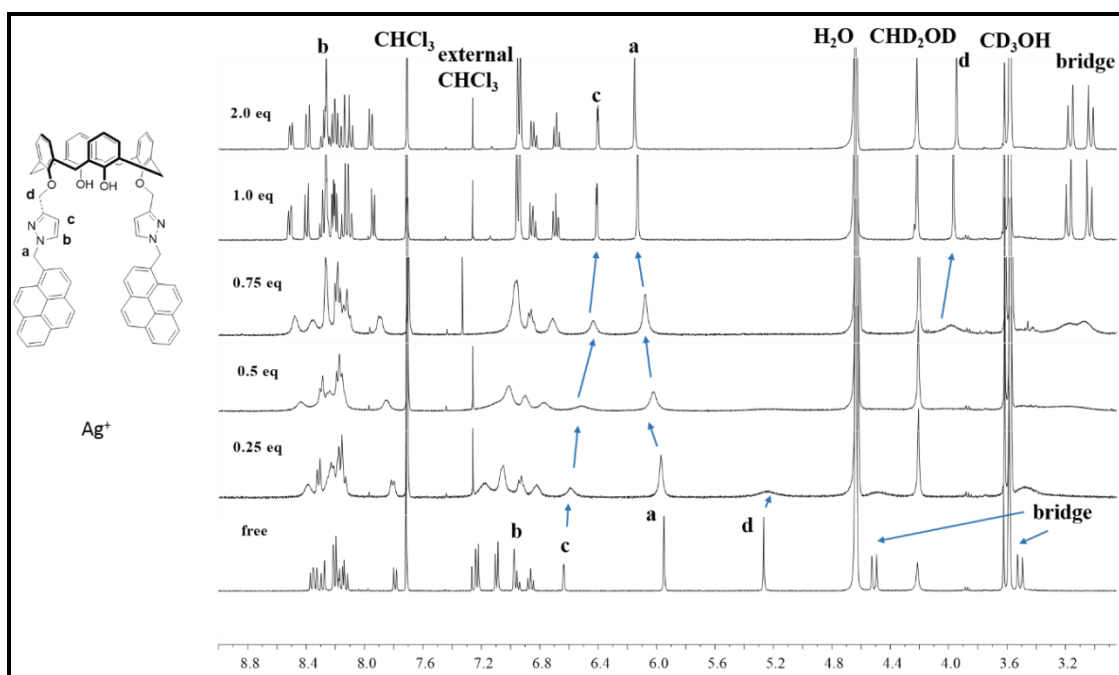

**Figure S10.** The  $^1\text{H}$  NMR titration of ligand **3** (1.33 mM) in  $\text{CDCl}_3/\text{CD}_3\text{OH}$  (v/v, 3:1) in the presence of different equiv of  $\text{AgClO}_4$ : (a) 0, (b) 0.25, (c) 0.5, (d) 0.75, (e) 1.0, and (f) 2.0.

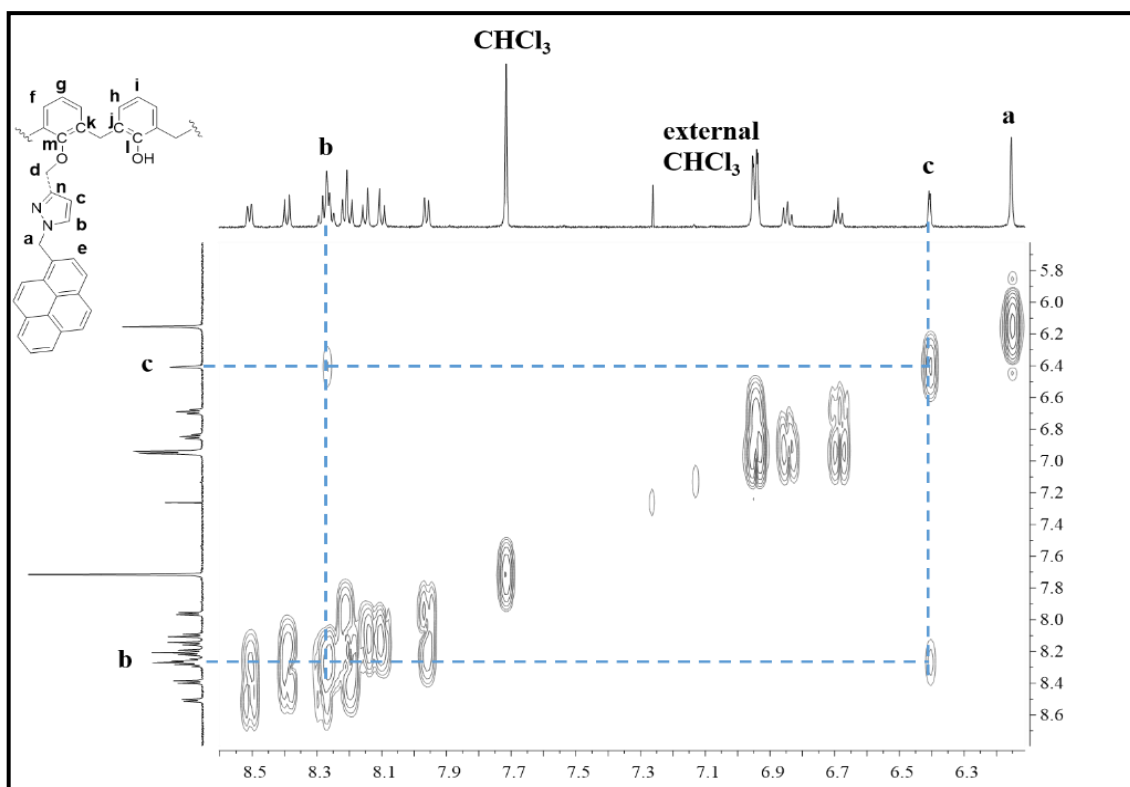

**Figure S11.** The  $^1\text{H}$ , $^1\text{H}$ -COSY of ligand **3** in the presence of 2 equiv of  $\text{Ag}^+$  in  $\text{CDCl}_3/\text{CD}_3\text{OH}$  (v/v, 3:1).

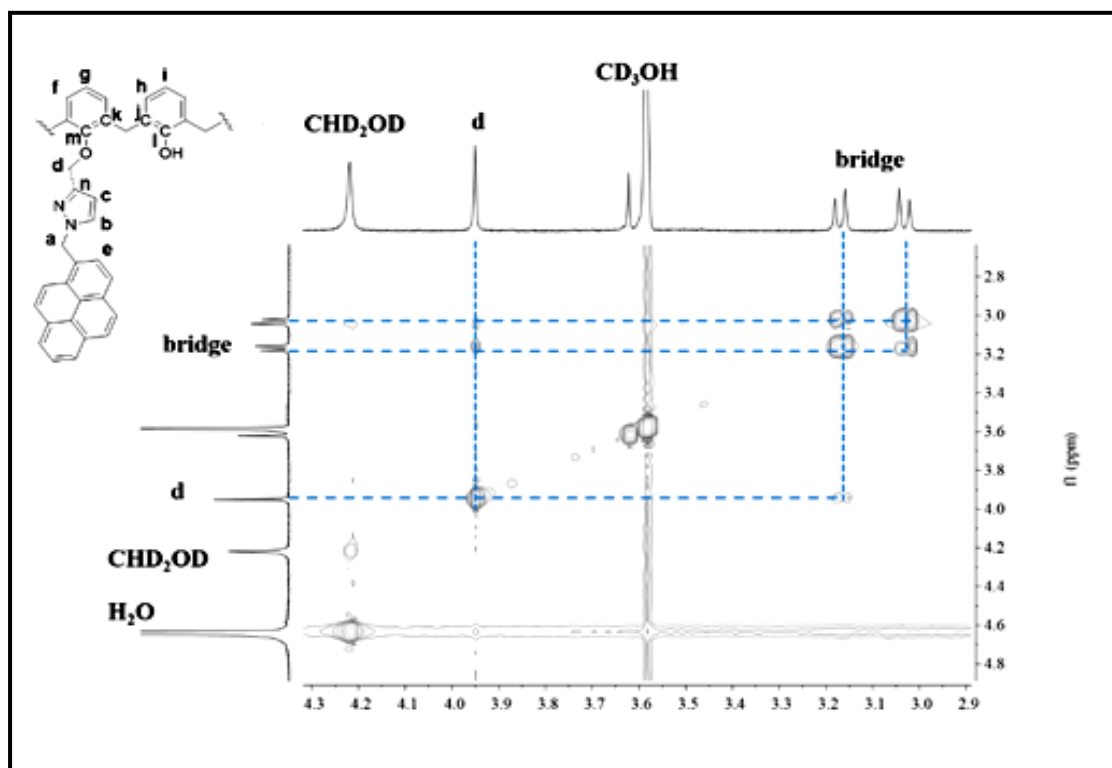

**Figure S12.** The 2D-NOESY spectrum of ligand **3** in the presence of 2 equiv of  $\text{Ag}^+$  in  $\text{CDCl}_3/\text{CD}_3\text{OH}$  (v/v, 3:1).

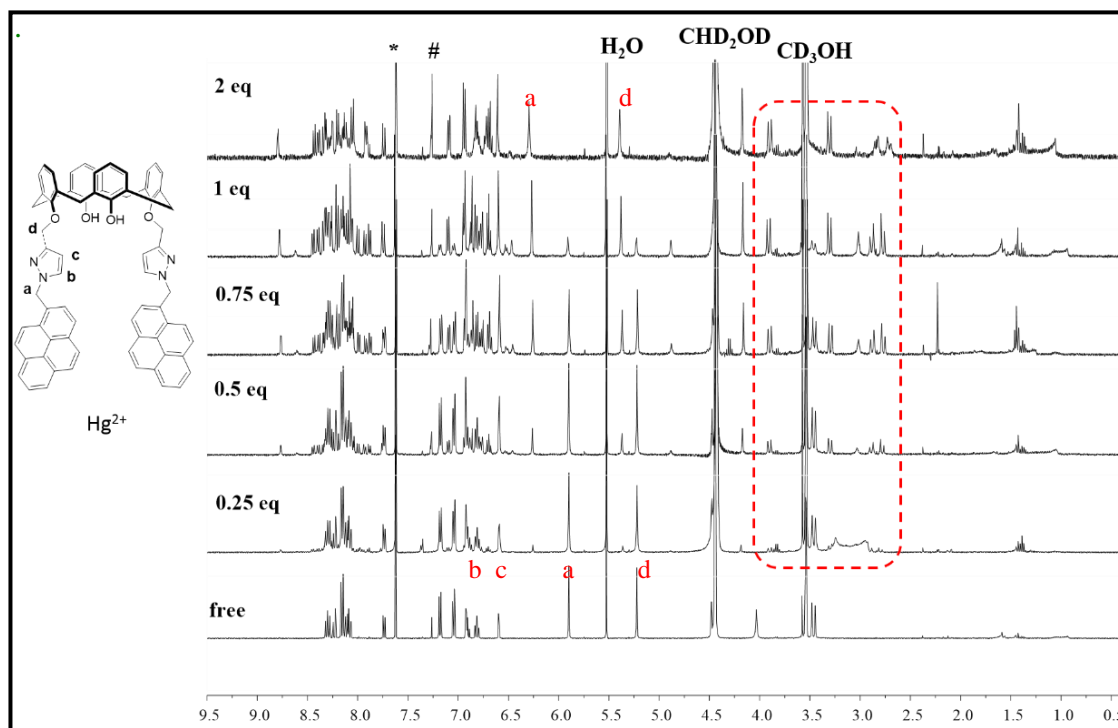

**Figure S13.** The  $^1\text{H}$  NMR titration of ligand **3** (1.33 mM) in  $\text{CDCl}_3/\text{CD}_3\text{OH}$  (v/v, 3:1) in the presence of different equiv of  $\text{Hg}(\text{ClO}_4)_2$ : (a) 0, (b) 0.25, (c) 0.5, (d) 0.75, (e) 1.0, and (f) 2.0.

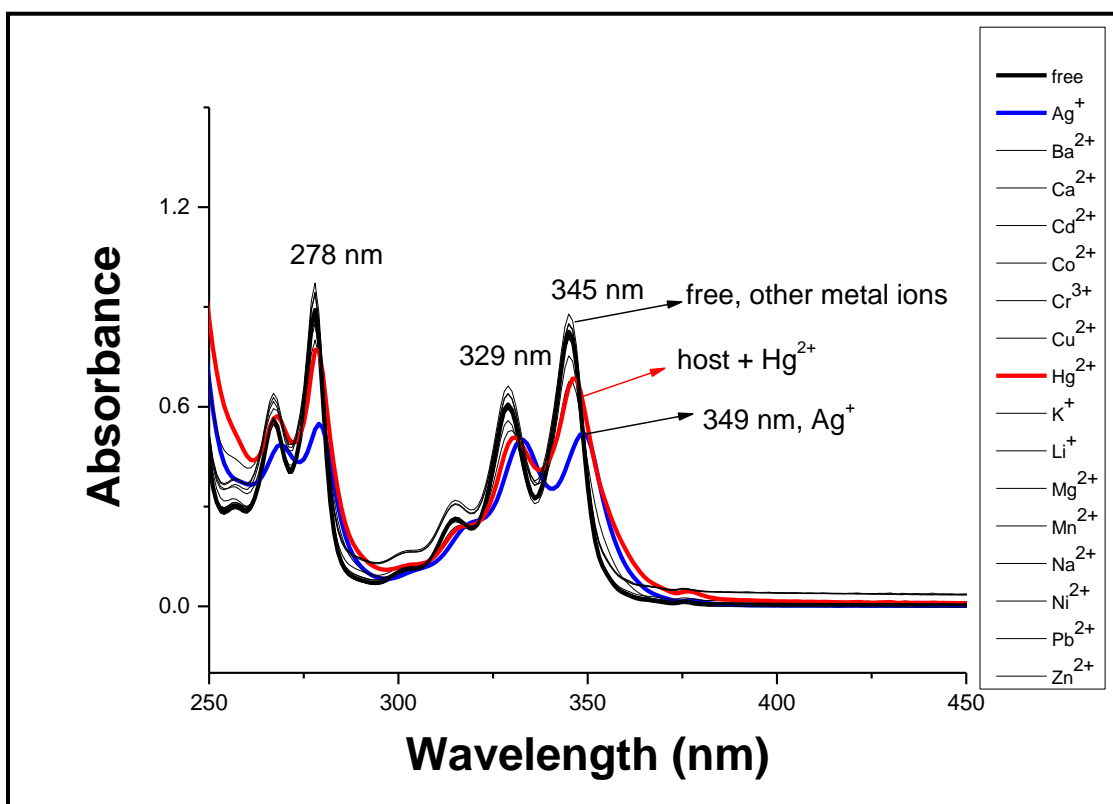

**Figure S14.** UV-Vis spectrum of ligand **8** (10  $\mu\text{M}$ ) by the addition of 10 equiv of various metal perchlorates ( $\text{Ag}^+$ ,  $\text{Ba}^{2+}$ ,  $\text{Ca}^{2+}$ ,  $\text{Cd}^{2+}$ ,  $\text{Co}^{2+}$ ,  $\text{Cr}^{3+}$ ,  $\text{Cu}^{2+}$ ,  $\text{Hg}^{2+}$ ,  $\text{Li}^+$ ,  $\text{Na}^+$ ,  $\text{K}^+$ ,  $\text{Mg}^{2+}$ ,  $\text{Ni}^{2+}$ ,  $\text{Pb}^{2+}$ , and  $\text{Zn}^{2+}$ ) in co-solvent  $\text{CHCl}_3/\text{MeOH}$  (v/v, 3:1).

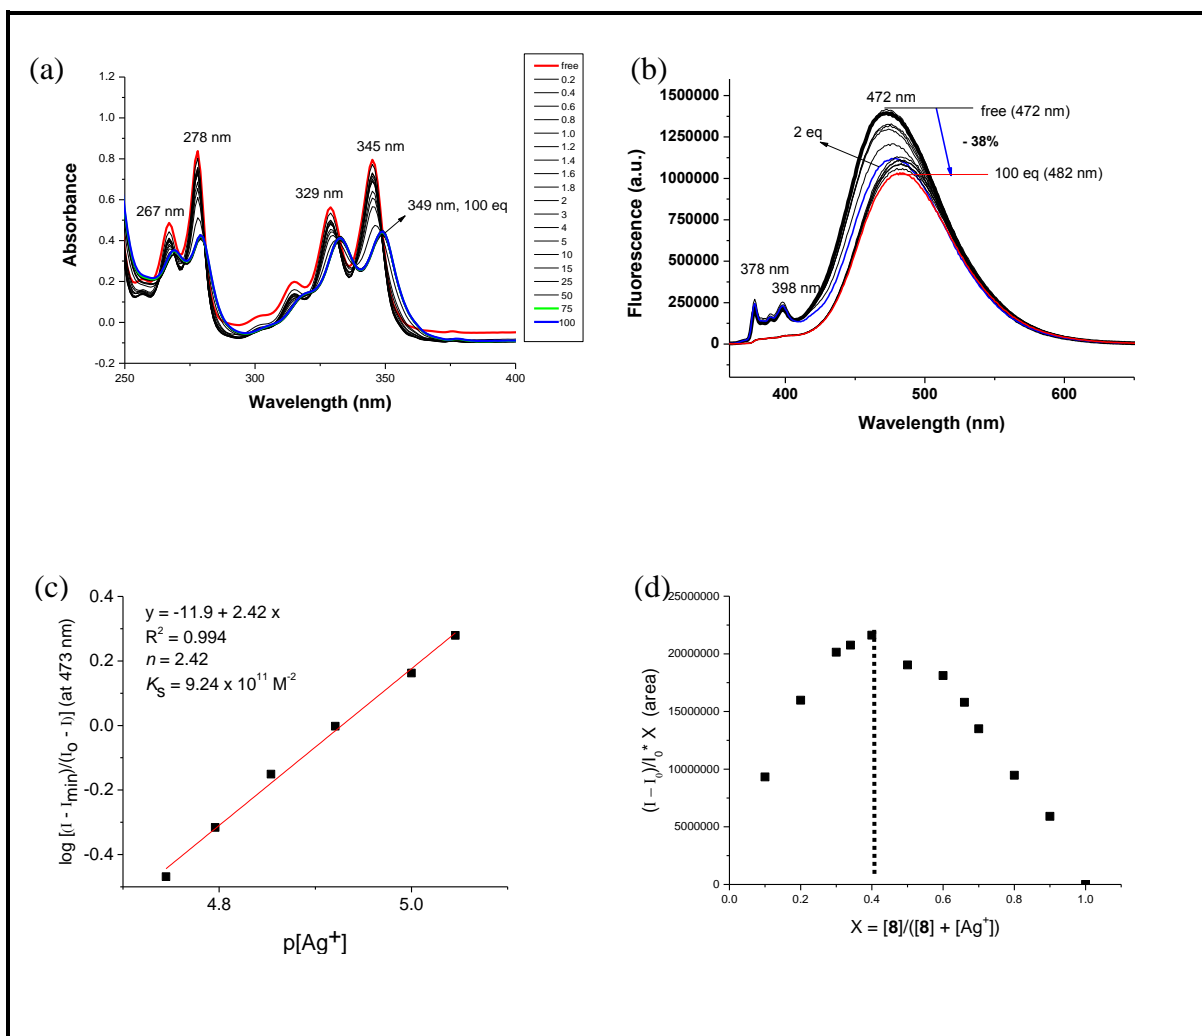

**Figure S15.** (a) The UV-Vis spectra, (b) the fluorescence emission spectra, (c) the Hill plot fitting, and (d) the Job plot of ligand **8** (10  $\mu\text{M}$ ) with various equiv of  $\text{AgClO}_4$  in co-solvent  $\text{CHCl}_3/\text{MeOH}$  (v/v, 3:1). The excitation wavelength was 339 nm.

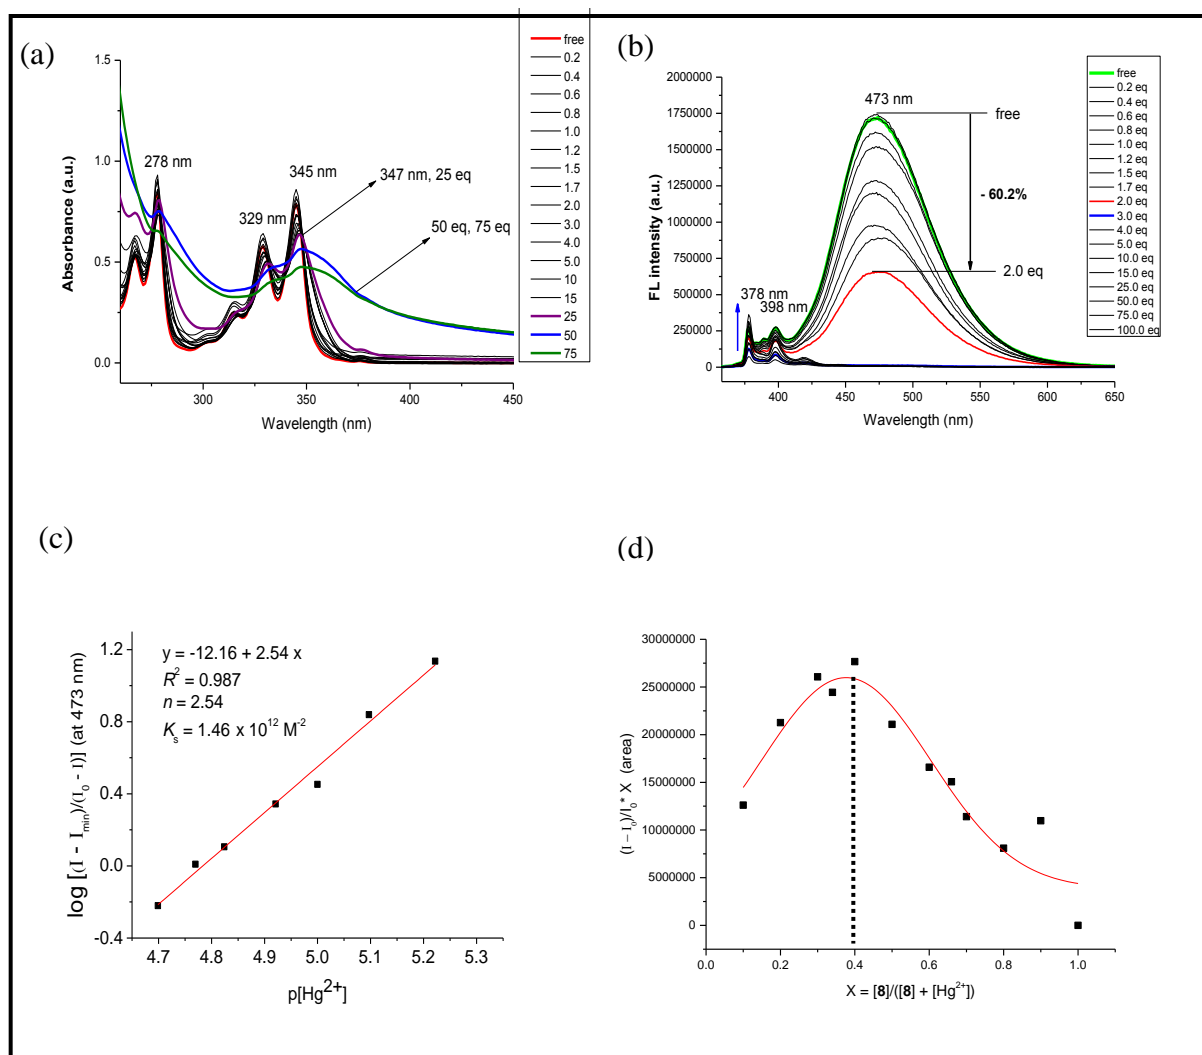

**Figure S16.** (a) The UV-Vis spectra, (b) the fluorescence emission spectra, (c) the Hill plot fitting, and (d) the Job plot of ligand **8** (10  $\mu\text{M}$ ) with various equiv of  $\text{Hg}(\text{ClO}_4)_2$  in co-solvent  $\text{CHCl}_3/\text{MeOH}$  (v/v, 3:1).

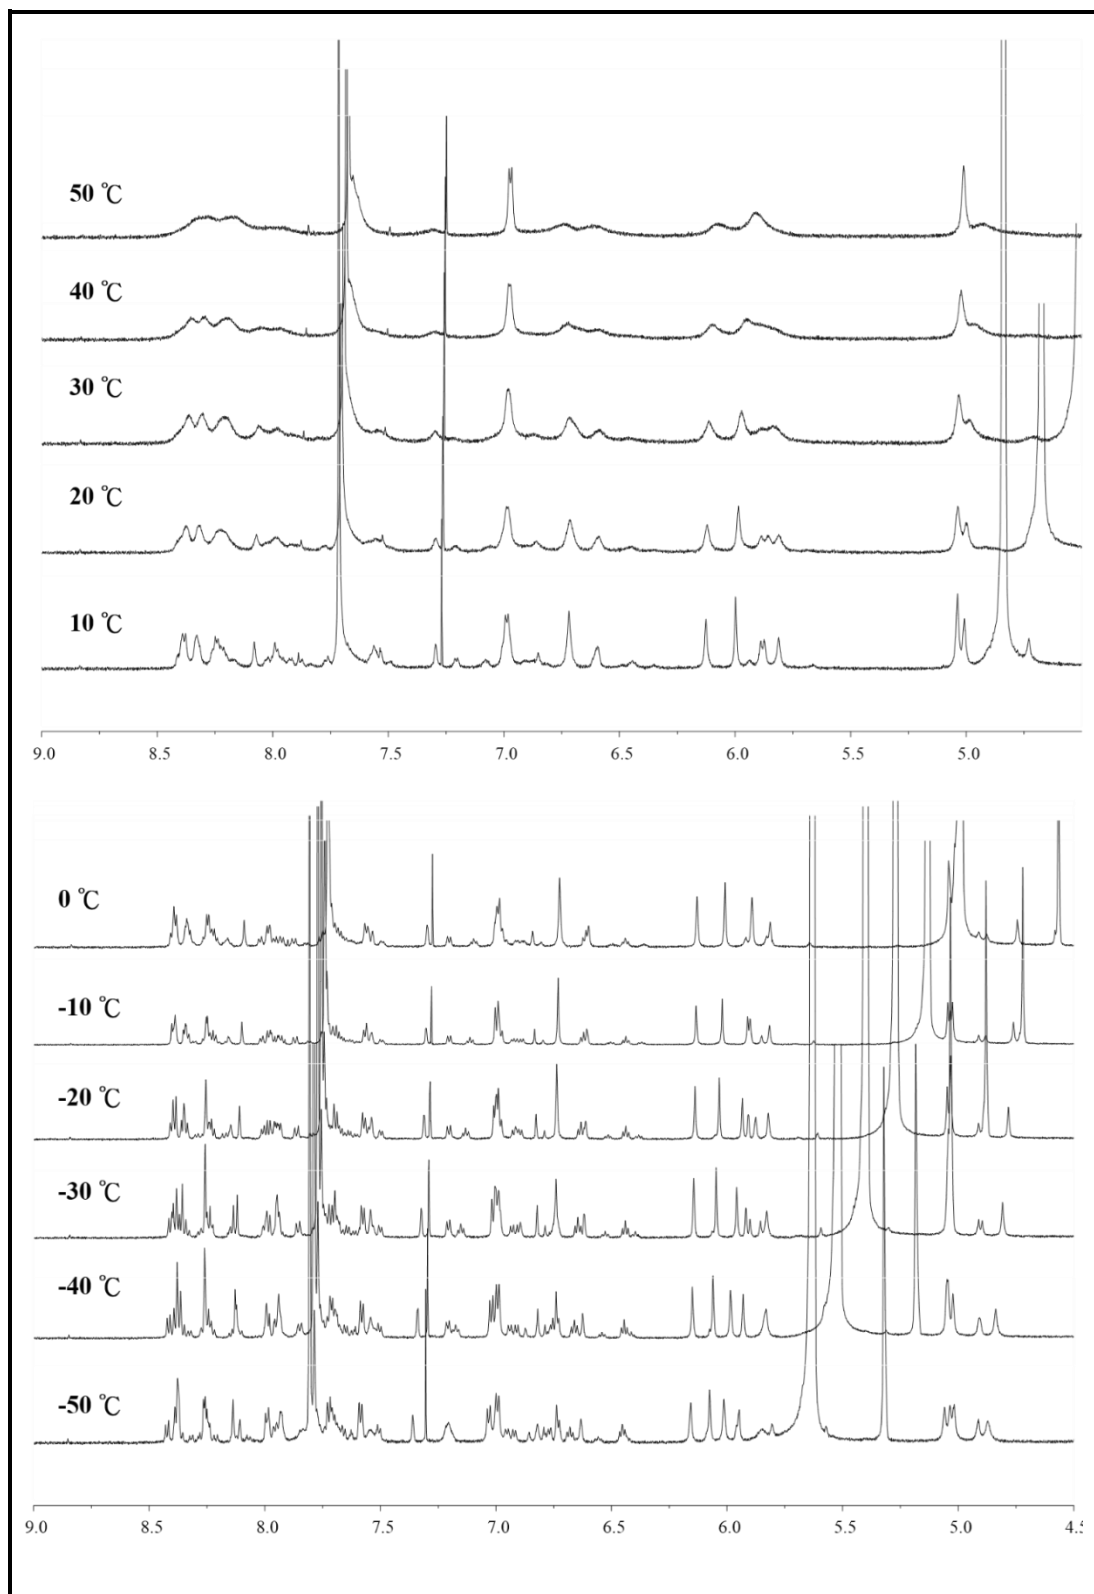

**Figure S17.** Variable temperature <sup>1</sup>H NMR spectra (-50 to 50 °C, 600 MHz) of ligand **8** (1.33 mM) in CDCl<sub>3</sub>/CD<sub>3</sub>OH (v/v, 3:1) with 1 equiv of AgClO<sub>4</sub>.

<Spectrum>1.3-click-Ag-003.lcd

Pos ESI-MS

Scan No.:457(261~653)

Base Peak 1463.48 Intensity 130252

Data File D:\貴儀\20130703\鍾文聖\1.3-click-Ag-003.lcd

Intensity

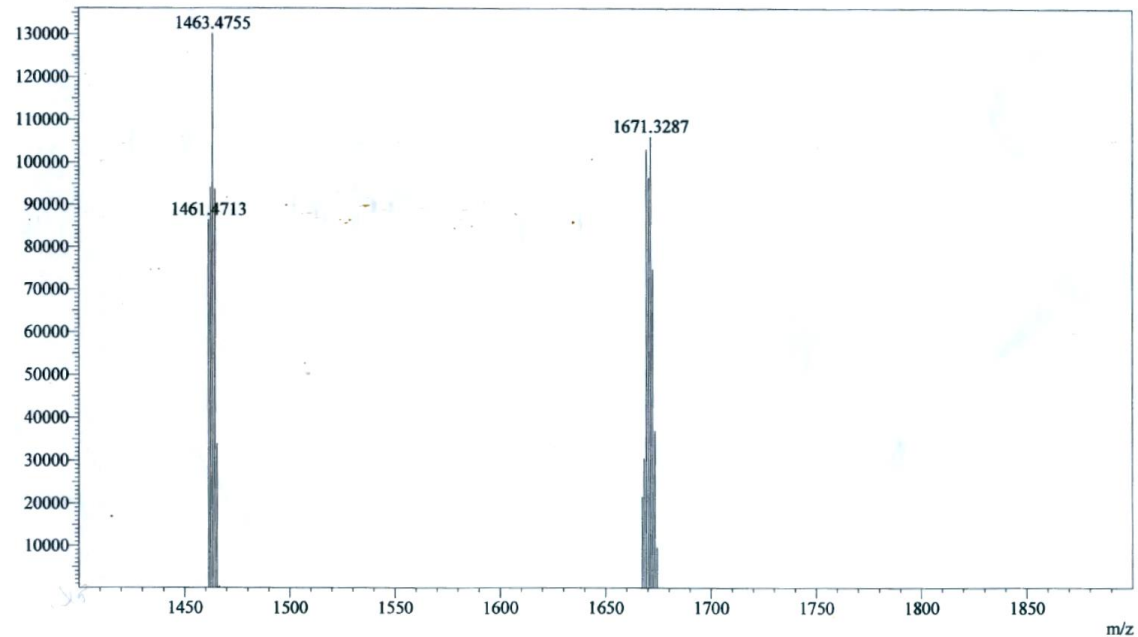

<Spectrum>1.3-click-Ag-003.lcd

Pos ESI-MS

Scan No.:457(261~653)

Base Peak 1463.48 Intensity 130252

Data File D:\貴儀\20130703\鍾文聖\1.3-click-Ag-003.lcd

Intensity

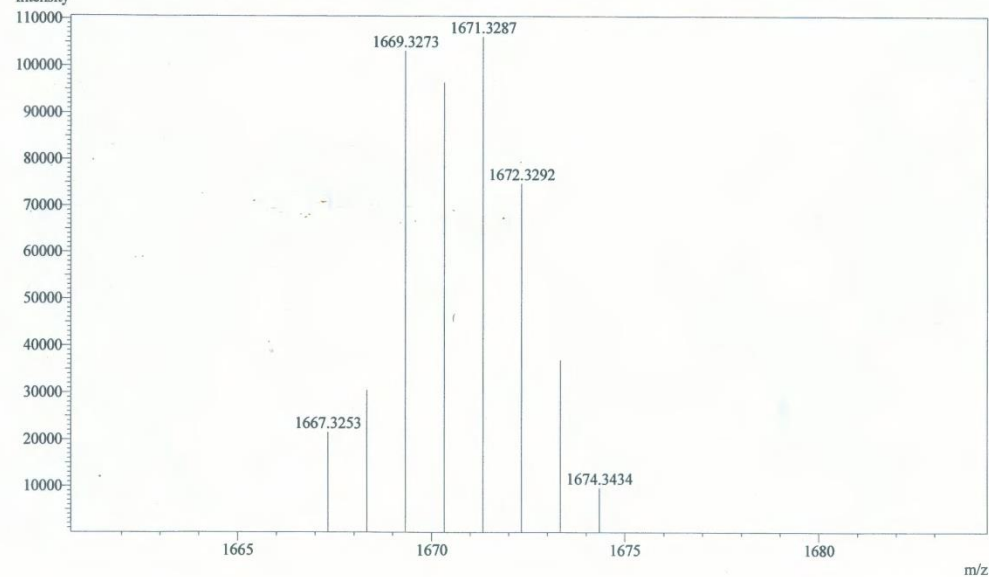

Figure S18. The ESI-MS data of the complex  $8 \cdot (\text{Ag}^+)_2 \cdot \text{ClO}_4^-$ .

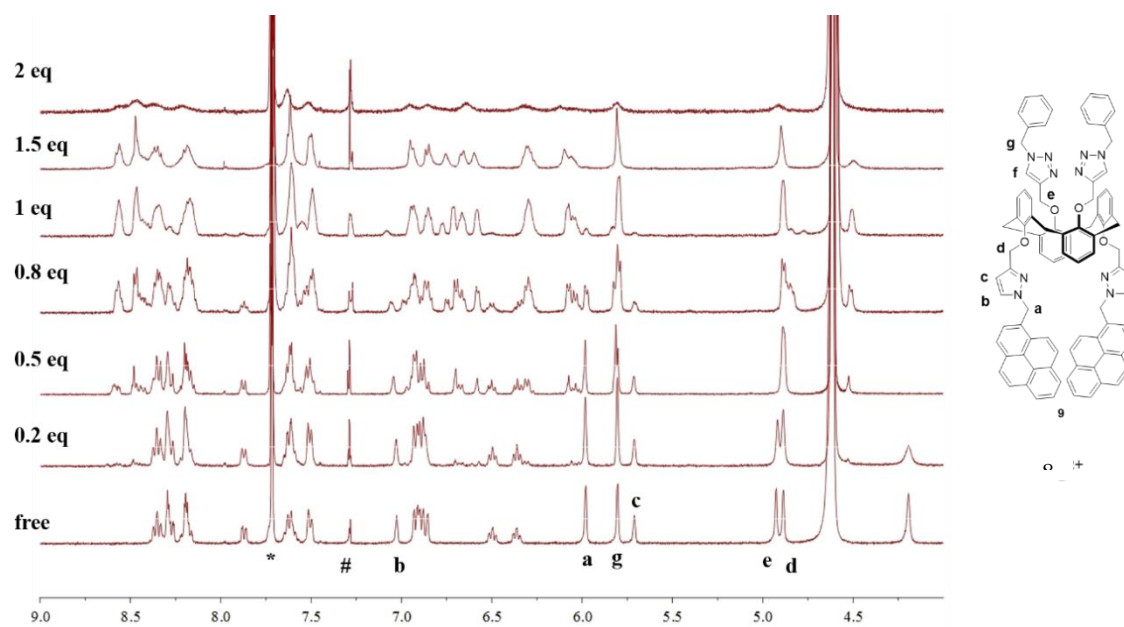

**Figure S19.** The  $^1\text{H}$  NMR titration spectra of ligand **8** (1.33 mM) in the presence of different equiv of  $\text{Hg}(\text{ClO}_4)_2$  in  $\text{CDCl}_3/\text{CD}_3\text{OH}$  (v/v, 3:1); where \* denotes residual  $\text{CHCl}_3$  and # denotes external  $\text{CHCl}_3$ .
